# Supplementary material
Source: PubMed Central journal article supplement (PMC8555690)

**A) Kaplan–Meier plots for cancer mortality**

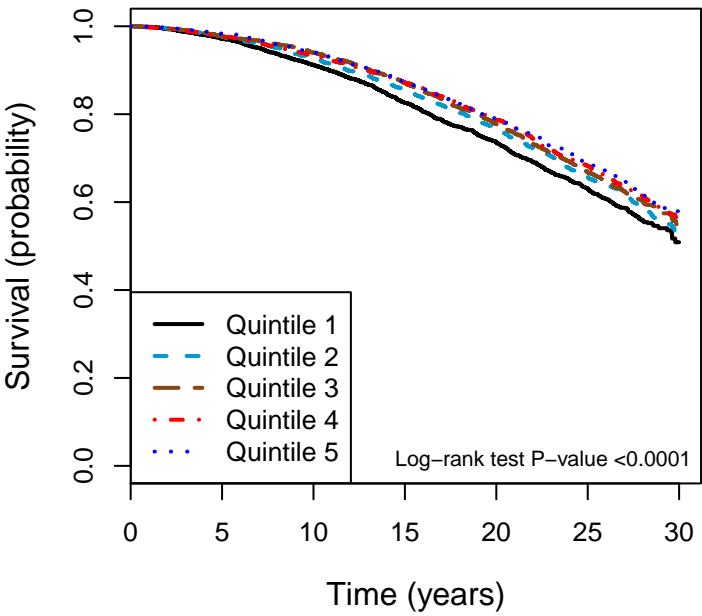

**B) Kaplan–Meier plots for respiratory disease mortality**

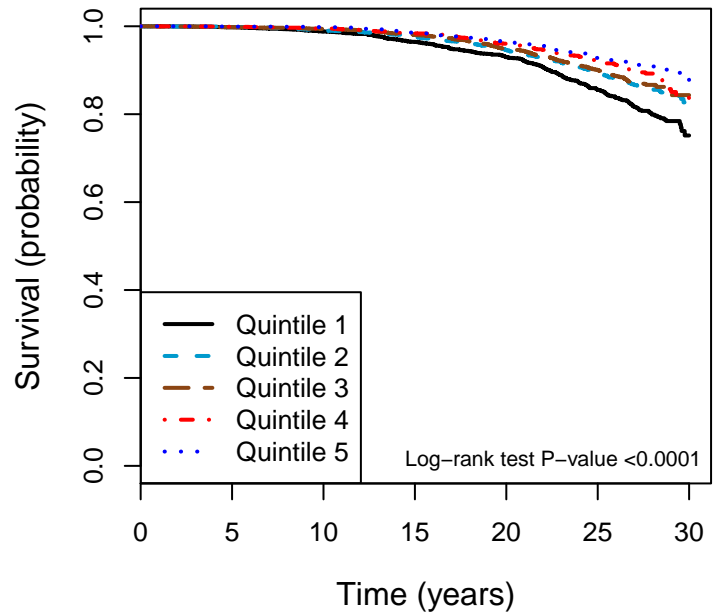

**C) Kaplan–Meier plots for other cause mortality**

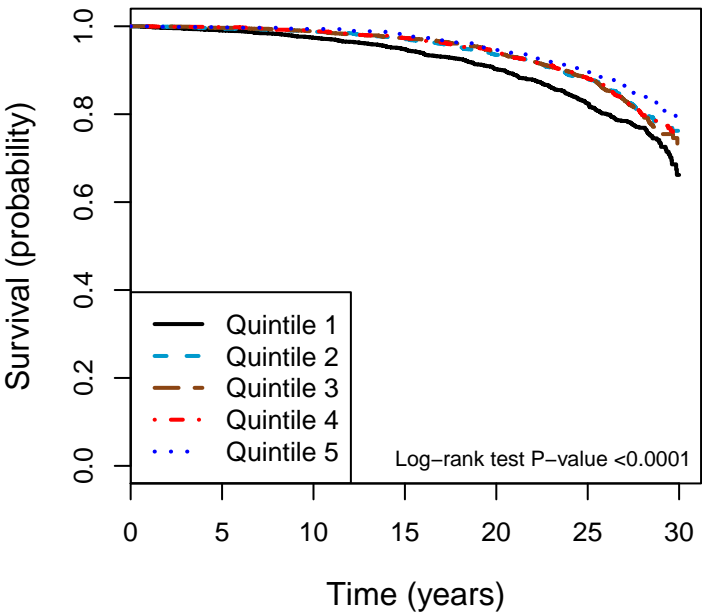

Supplement: NIHMS1741243-supplement-Online_Figure_III.pdf [file NIHMS1741243-supplement-Online_Figure_III.pdf]
