# Supplementary material
Source: PubMed Central journal article supplement (PMC8555690)

### Cancer Mortality

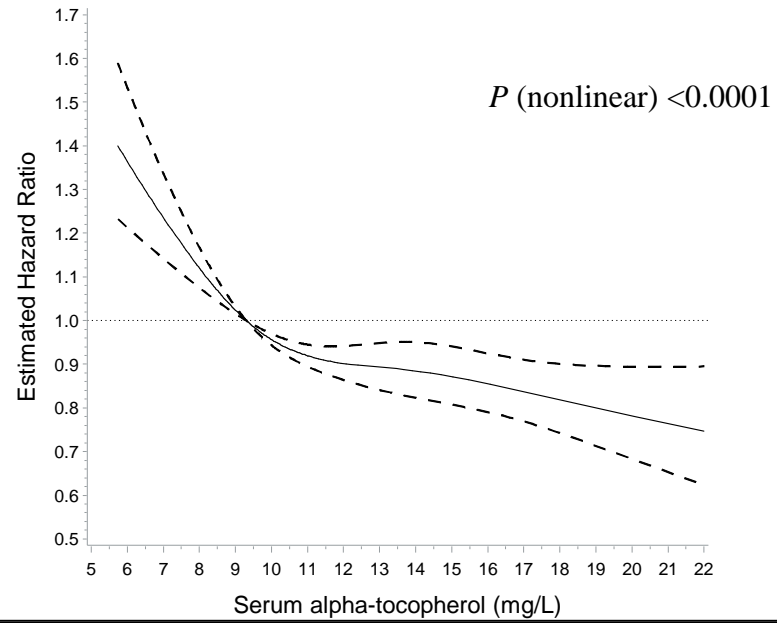

### Respiratory Mortality

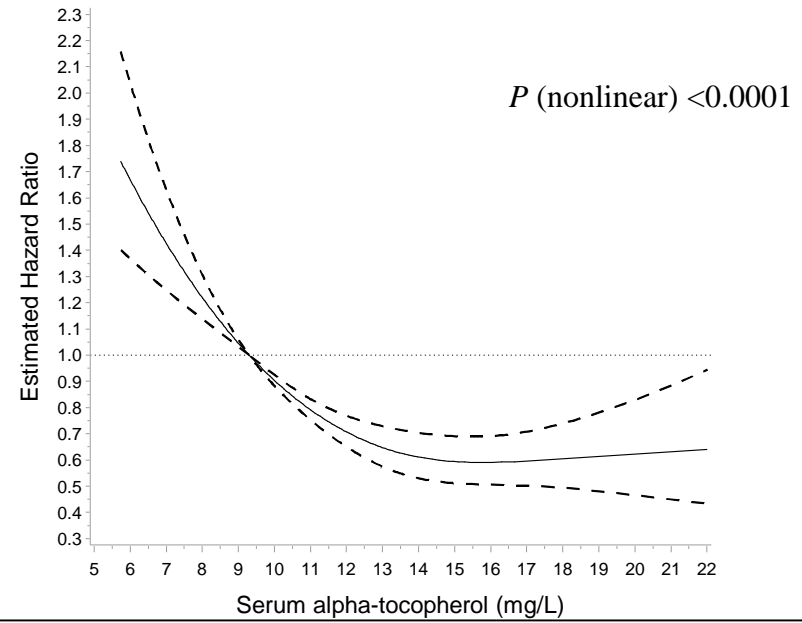

### Other Cause Mortality

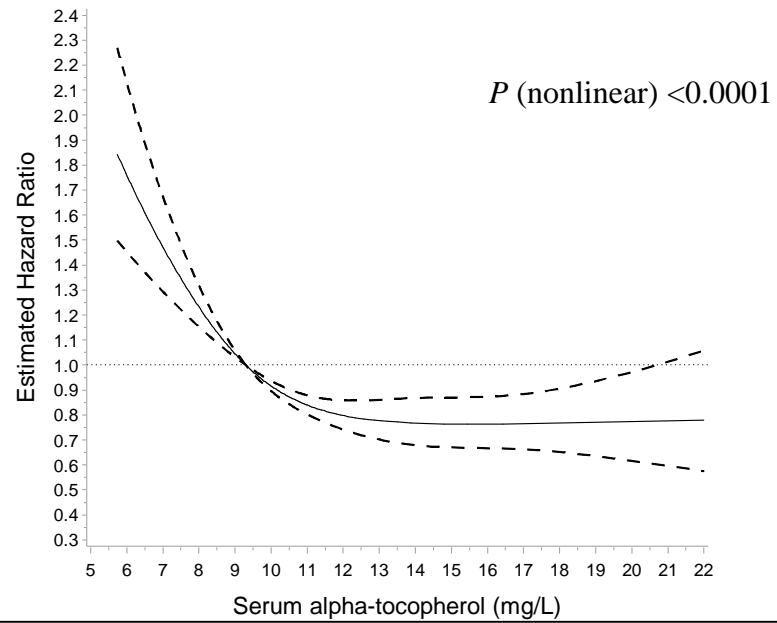

Supplement: NIHMS1741243-supplement-Online_Figure_IV.pdf [file NIHMS1741243-supplement-Online_Figure_IV.pdf]
